# Supplementary material
Source: Springer Nature journal article supplement (https://www.springermedizin.de/resource/supplementary/12959_2011_152_MOESM7_ESM.pdf/9569184)

**A**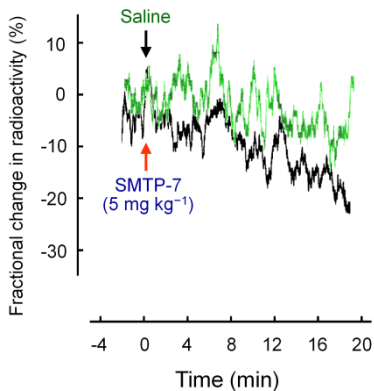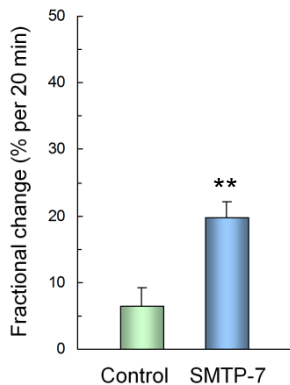**B**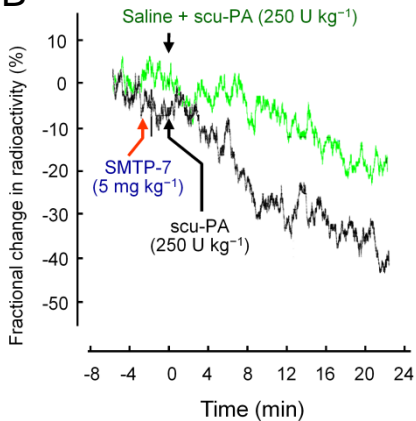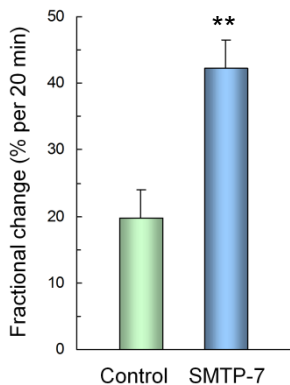

Supplement: MOESM7 [file 9569184]
